# 1      **Green light perception paved the way for the** 2      **diversification of GAF domain** 3      **photoreceptors**

## 4      **Authors**

5      Nibedita Priyadarshini<sup>a,b,1</sup>, Niklas Steube<sup>c,1</sup>, Dennis Wiens<sup>c</sup>, Rei Narikawa<sup>e,f</sup>,  
6      Annegret Wilde<sup>a</sup>, Georg K. A. Hochberg<sup>c,d,\*</sup>, and Gen Enomoto<sup>a,\*</sup>

## 7      **Affiliations**

8      <sup>a</sup>Faculty of Biology, Institute of Biology III, University of Freiburg, Schänzlestr. 1,  
9      79104 Freiburg, Germany

10     <sup>b</sup>Spemann Graduate School of Biology and Medicine, Albertstraße-19, 79104  
11     Freiburg, Germany

12     <sup>c</sup>Max Planck Institute for Terrestrial Microbiology, Karl-von-Frisch-Str. 10, 35043  
13     Marburg, Germany

14     <sup>d</sup>Faculty of Chemistry, University of Marburg, Hans-Meerwein-Straße 4, 35032  
15     Marburg, Germany

16     <sup>e</sup>Graduate School of Integrated Science and Technology, Shizuoka University,  
17     836 Ohya, Suruga, Shizuoka 422-8529, Japan

18     <sup>f</sup>Graduate School of Biological Sciences, Faculty of Science, Tokyo Metropolitan  
19     University, 1-1 Minami-Ohsawa, Hachioji, Tokyo 192-0397, Japan

20

21     <sup>1</sup>These authors contributed equally to this work and are listed in alphabetical  
22     order.

23 \*To whom correspondence may be addressed. Email: [georg.hochberg@mpi-](mailto:georg.hochberg@mpi-marburg.mpg.de)  
24 [marburg.mpg.de](mailto:marburg.mpg.de) or [gen.enomoto@biologie.uni-freiburg.de](mailto:gen.enomoto@biologie.uni-freiburg.de)

25

26 **Author Contributions:** G.K.A.H. and G.E. designed research; N.P., N.S., D.W.,  
27 and G.E. performed research; all authors analyzed data; all authors contributed  
28 to writing the paper.

29 **Competing Interest Statement:** The authors declare no competing interest.

30 **Classification:** BIOLOGICAL SCIENCES, Biochemistry.

31 **Keywords (3–5):** ancestral sequence reconstruction | bilin-based photoreceptor |  
32 cyanobacteriochromes | photobiology | GAF domain

33 This PDF file includes:

34 Main Text

35 Figures 1 to 3

36 Tables 1 to 2

## 37 **Abstract**

38 Photoreceptors are proteins that sense incident light and then trigger downstream  
39 signaling events. Phytochromes are linear tetrapyrrole-binding photoreceptors  
40 present in plants, algae, fungi, and various bacteria. Most phytochromes respond to  
41 red and far-red light signals. Among the phytochrome superfamily, cyanobacteria-  
42 specific cyanobacteriochromes show much more diverse optical properties covering  
43 the entire visible region. Both phytochromes and cyanobacteriochromes share the  
44 GAF domain scaffold to cradle the chromophore as the light-sensing region. It is  
45 unknown what physiological demands drove the evolution of cyanobacteriochromes  
46 in cyanobacteria. Here we utilize ancestral sequence reconstruction and report that  
47 the resurrected ancestral cyanobacteriochrome proteins reversibly respond to green  
48 and red light signals. pH titration analyses indicate that the deprotonation of the  
49 bound phycocyanobilin chromophore enables the photoreceptor to perceive green  
50 light. The ancestral cyanobacteriochromes show modest thermal reversion to the  
51 green light-absorbing form, suggesting that they evolved to sense green-rich  
52 irradiance rather than red light, which is preferentially utilized for photosynthesis. In  
53 contrast to plants and green algae, many cyanobacteria can utilize green light for  
54 photosynthesis with their special light-harvesting complexes, phycobilisomes. The  
55 evolution of green/red sensing cyanobacteriochromes may therefore have allowed  
56 ancient cyanobacteria to acclimate to different light environments by rearranging the  
57 absorption capacity of the cyanobacterial antenna complex by chromatic acclimation.

## 58 **Significance Statement**

59 Light serves as a crucial environmental stimulus affecting the physiology of  
60 organisms across all kingdoms of life. Photoreceptors serve as important players  
61 of light responses, absorbing light and actuating biological processes. Among a  
62 plethora of photoreceptors, cyanobacteriochromes arguably have the wealthiest  
63 palette of color sensing, largely contributing to the success of cyanobacteria in  
64 various illuminated habitats. Our ancestral sequence reconstruction and the  
65 analysis of the resurrected ancestral proteins suggest that the very first  
66 cyanobacteriochrome most probably responded to the incident green-to-red light  
67 ratio, in contrast to modern red/far-red absorbing plant phytochromes. The  
68 deprotonation of the light-absorbing pigment for green light-sensing was a crucial  
69 molecular event for the invention of the new class of photoreceptors with their  
70 huge color tuning capacity.

## 71 Introduction

72 Most light-dependent cellular responses are controlled by photoreceptors which  
73 sense light and then trigger downstream signal transduction events (1). Members  
74 of the phytochrome superfamily of photoreceptors covalently bind a linear  
75 tetrapyrrole (bilin) molecule as a chromophore to a cysteine (Cys) residue of the  
76 protein (2, 3). The configuration of the bound bilin chromophore reversibly  
77 interconverts between *15Z* and *15E*, corresponding to the two isomers at the  
78 C15=C16 double bond ([Figure S1](#)) (4). These two states of the chromophore  
79 often result in different optical properties, enabling the proteins to sense two  
80 different colors of light, in most cases red and far-red. The reversible  
81 photochromicity allows the photoreceptor to perceive the ratio of two wavelengths  
82 of the incident light. Many phytochromes show thermal reversion (dark reversion),  
83 reverting from *15E* to *15Z* without any light absorption. Thermal reversion is a  
84 temperature-dependent process, and therefore the same photoreceptor  
85 integrates light and temperature signals (5). A fast dark reversion of a  
86 photoreceptor indicates that the protein senses the intensity of the incident light  
87 rather than the ratio of the two wavelengths (6).

88 Within the phytochrome superfamily, cyanobacteriochromes (CBCRs) are a  
89 distinct class of minimal photoreceptors (7, 8), which only need a single GAF  
90 (cGMP phosphodiesterase, adenylyl cyclase, and FhIA) domain to genuinely  
91 sense light. This is in contrast to other phytochrome members that strictly require  
92 at least another neighboring PHY domain for genuine light perception. The  
93 functional light sensing module of canonical phytochromes features a typical  
94 PAS-GAF-PHY tridomain architecture, with exception of some members lacking

95 the PAS domain (PAS-less phytochromes) that are closely related to CBCRs (2,  
96 3). Phytochromes are widespread among eukaryotes and bacteria whereas  
97 CBCRs are found exclusively in cyanobacteria, a group of photoautotrophic  
98 bacteria performing oxygenic photosynthesis. Through a process of gene  
99 duplication and domain shuffling, CBCRs have evolved a remarkable diversity in  
100 their absorption characteristics and thermal reversion kinetics (6, 9–12), making  
101 them a promising scaffold to develop a new generation of optogenetic tools (13–  
102 15). Depending on their properties, CBCRs control a diverse range of  
103 physiological processes in cyanobacteria (16). Green/red sensing CBCRs with  
104 slow reversion kinetics for instance are used to adjust the relative amounts of red  
105 and green absorbing photosynthetic pigments (phycocyanin and phycoerythrin,  
106 respectively) in phycobilisomes during chromatic acclimation by sensing the ratio  
107 of green and red wavelengths (11, 17, 18). Blue/green sensing CBCRs, on the  
108 other hand, are used to detect shading by other cells in cyanobacterial mats (19,  
109 20).

110 However, the original function of CBCRs which evolved early in evolution  
111 remains unknown. We have previously speculated that blue/green perceiving  
112 CBCR-mediated cell shade sensing might be the ancestral function of these  
113 photoreceptors (19), because blue/green photochemistry is unique to CBCRs and  
114 should be more efficient than red/far-red phytochromes in an upper region of a  
115 microbial mat, where blue light diminishes while green, red, and far-red light are  
116 still available. Further, early-branching cyanobacteria like *Gloeobacter violaceus*  
117 PCC 7421 and *Anthocerotibacter panamensis* (21) only possess this kind of  
118 blue/green perceiving CBCRs. Here, we used ancestral sequence reconstruction  
119 (22) to experimentally test this theory and inferred the photochemistry of the last

120 common ancestor (LCA) of all extant CBCRs. We show that ancient CBCR  
121 proteins most likely sensed the ratio of green to red incident light and that this  
122 inference is robust to alternative hypotheses about the exact branching order  
123 within CBCR GAF domains that is hard to resolve. Our results suggest that the  
124 first CBCR was likely used by cyanobacteria to tune the relative abundances of  
125 red and green light absorbing pigments in response to changes in the incident  
126 light. The stunning diversity of colors sensed by extant CBCRs nowadays  
127 therefore evolved from an ancient CBCR most likely used for chromatic  
128 acclimation.

## 129 **Results**

### 130 **Ancestral sequence reconstruction of cyanobacteriochromes**

131 In order to investigate the characteristics of the earliest CBCRs, we first used  
132 maximum likelihood phylogenetics and ancestral sequence reconstruction to infer  
133 the most likely GAF domain sequence of the LCA of extant CBCRs. We inferred  
134 a maximum likelihood phylogeny of 575 CBCR GAF domains with related PAS-  
135 less phytochromes' GAF domains as the outgroup. The phylogeny of the CBCR  
136 domains was difficult to resolve: we found multiple groups of GAF domains each  
137 containing the majority of cyanobacterial diversity. These groups are separated  
138 from each other by very short internal branches. In addition, our phylogenetic tree  
139 contains one group of CBCR GAF domains, sister to all others, that has a very  
140 narrow taxonomic distribution. It is connected by a very long internal branch that  
141 attaches to the long branch separating CBCR domains from the outgroup ([Figure](#)  
142 [1A](#), [Figure S2](#)). To ensure that our estimate of the sequence of the LCA of all

143 CBCR domains was not biased by this potential long-branch attraction artifact,  
144 we inferred two additional phylogenies from pruned alignments: for the first, we  
145 removed the sequences belonging to this long branching sister clade to all other  
146 CBCR domains from our alignment. In the second, we removed all sequences  
147 that had long terminal branches in our original phylogeny or were only poorly  
148 aligned. The two resulting topologies have slight rearrangements in branching  
149 order within the CBCR domains and represent different, but equally plausible  
150 topologies. While the exact branching order remains unclear, the three topologies  
151 agree on far-red/orange Ancy2551g3 and green/red SyCcaSg as early branching  
152 among the known characterized CBCR GAF domains ([Figure 1B,C](#)).

153 We then used ancestral sequence reconstruction to infer the most likely  
154 amino acid sequences of the LCA of extant CBCR GAF domains on all three  
155 topologies (Anc1–Anc3) to an average posterior probability of between 0.81 and  
156 0.94 ([Figure S3](#)). All ancestral sequences contained the conserved “first” cysteine  
157 that binds the bilin chromophore in extant CBCRs but differed at between 37 and  
158 44 out of 142 total residues ([Figure 1D](#), [Figure S4](#)).

159 Although CBCR GAF domains can sense light on their own, they are usually  
160 part of multidomain proteins. To estimate the most probable domain architecture  
161 of the ancestral CBCR protein, we further compared the neighbor and output  
162 domains of the corresponding full-length proteins of CBCR GAF domains on our  
163 trees. We found PAS domains that are mandatory in distantly related canonical  
164 phytochromes as the most abundant neighbors, and histidine kinase HATPase  
165 domains as the most prominent output domains ([Figure 1A-C](#)). This indicates that  
166 the LCA of all CBCRs was most parsimoniously encoded on a phytochrome-like  
167 multidomain protein, and transduced its signal to a histidine kinase domain.



## 168 **The ancestral CBCR GAF domain most likely had a green/red photocycle**

169 We next determined the photochemical properties of the ancestral CBCR GAF  
170 domains. We expressed and purified the three ancestral sequences as  
171 recombinant N-terminal His-tagged proteins from *E. coli* harboring a biosynthesis  
172 plasmid for the chromophore phycocyanobilin (PCB). The Zn-enhanced  
173 fluorescence of the purified proteins in an SDS-PAGE gel confirmed the covalent  
174 attachment of PCB to the apoproteins ([Figure S5](#)) (23). The absorbance spectra  
175 of the purified holoproteins showed spectral changes upon illumination with blue,  
176 green, and red light. However, irradiation with UV and far-red light did not affect  
177 the spectra. All ancestral proteins exhibited reversible photoconversion between  
178 green (Pg) and red (Pr) absorbing forms ([Figure 2](#)). The bound chromophore and  
179 its configuration were determined using acid denaturation spectra with the red-  
180 irradiated state (i.e., Pg) peaking at 662 nm and the green-irradiated state (i.e.,  
181 Pr) peaking at 585 nm, in agreement to *15Z* and *15E* forms of the covalently  
182 bound PCB, respectively ([Figure S6](#)) (24). The <sup>15Z</sup>Pg state showed absorption  
183 maxima between 515 nm and 540 nm, and the <sup>15E</sup>Pr state between 600 nm and  
184 656 nm for all the ancestral proteins ([Figure 2](#), [Table 1](#)). For Anc2 and Anc3,  
185 irradiation with red ( $\lambda_{\max} = 635$  nm) resulted in almost complete conversion to the  
186 <sup>15Z</sup>Pg form. For Anc1, we did not yield a homogeneous population of <sup>15Z</sup>Pg,  
187 probably due to the significant overlap of the absorption spectra of the two  
188 photostates ([Figure 2](#), [Figure S6](#)). The additional incubation of Anc1 overnight in  
189 the dark at room temperature allowed complete conversion to <sup>15Z</sup>Pg ([Figure S6](#)).  
190 Irradiation with blue ( $\lambda_{\max} = 448$  nm) and green ( $\lambda_{\max} = 514$  nm) rendered  
191 complete conversion to the <sup>15E</sup>Pr state for Anc1 and Anc2. For Anc3, green  
192 irradiation resulted in partial conversion. Almost complete conversion was

193 achieved upon blue irradiation, probably due to its good separation from the  
194 counteracting red region ([Figure 2](#), [Figure S6](#)). Although blue light could induce  
195 photoconversion, we characterize the ancestral proteins as green-light sensors  
196 because the peak wavelengths of the absorption spectra and the difference  
197 spectra both fall into the green-light region ([Figure 2D](#)). Altogether, these results  
198 show that a green/red photocycle most likely existed in the LCA of all CBCRs,  
199 regardless of the exact branching order of basal CBCRs.

### 200 **PCB was the ancestral chromophore in CBCRs**

201 Although most CBCRs incorporate PCB, some CBCRs can bind biliverdin IXa (BV)  
202 as the chromophore with variable specificity (25, 26). To determine the efficiency  
203 of BV incorporation by the ancestral proteins, we expressed all of them with a BV  
204 biosynthesis plasmid in *E. coli* and purified them. Acid denaturation spectra  
205 confirmed the attached chromophore to be BV with the denatured <sup>15</sup>ZP<sub>g</sub> peaking  
206 at around 700 nm ([Figure S7](#)) (26). All ancestral proteins showed slight  
207 photoconversion with BV as the chromophore upon irradiation with both green and  
208 red light. However, for Anc1 and Anc2, neither lights were sufficient to cause  
209 complete photoconversion to either *15E* or *15Z* photostates ([Figure S7](#)). Red  
210 irradiation caused a complete conversion of Anc3-BV to the *15Z* photostate.  
211 However, a complete conversion to the *15E* photostate was not achieved by green  
212 irradiation. These data suggest that the ancestral CBCRs are able to bind to both  
213 PCB and BV, but photoconversion is much more efficient with PCB. Overall, we  
214 infer that PCB was the *bona fide* chromophore for the LCA of all CBCR GAF  
215 domains. Specificity for BV is therefore a derived trait of some crown group CBCRs  
216 (25). This is consistent with canonical phytochromes in the outgroup also being

217 specific for PCB (27, 28). Besides, PCB is one of the prosthetic groups of the very  
218 abundant phycobiliproteins of the photosynthetic antenna complex and is therefore  
219 much more abundant in cyanobacterial cells (29).

## 220 **The ancestral CBCR GAF domain was a sensor of the spectral ratio via a** 221 **protochromic photocycle**

222 We next asked whether the heterologously expressed ancestral proteins sensed  
223 the intensity of green or red light rather than the green/red ratio. To determine this,  
224 we measured their rates of thermal reversion. Fast thermal reversion leads to  
225 short-lived photoproducts regardless of any counteracting light. Therefore, the  
226 population of the photoproduct only depends on the intensity of light that excites  
227 the dark state (6). In contrast, slow thermal reversion allows the formation of long-  
228 lived photostates and therefore supports sensing of the ratio of two different  
229 wavelengths. All three ancestral proteins underwent slow thermal reversion from  
230  $^{15E}Pr$  to  $^{15Z}Pg$  in the dark at room temperature ([Figure S8](#)): The half-lives for the  
231 thermal reversion in the dark at room temperature ranged between 180 min and  
232 310 min ([Table 1](#)), comparable to the related PAS-less phytochromes (27). These  
233 half-lives are much longer than those of known intensity-sensing CBCRs (which  
234 revert within the range of several seconds) (6, 30). Our results therefore indicate  
235 that the LCA of all CBCRs likely sensed the ratio of green to red incident light rather  
236 than the intensity of these wavelengths.

237 Extant green/red light-sensing CBCRs adopt a protochromic photocycle (11, 31):  
238 The chromophore is deprotonated with a lower  $pK_a$  value in the  $^{15Z}$  state to absorb  
239 green light, whereas it is protonated with a higher  $pK_a$  value in the  $^{15E}$  state to  
240 absorb red light. To assess whether this was also the ancestral photocycle

241 mechanism in CBCR GAF domains, we performed pH titration analysis for the  
242 three ancestral proteins.

243 Anc1–3 showed a decrease of red-light absorption and an increase of green-  
244 light absorption at higher pH conditions ([Figure 3](#), [Figure S9](#)). At lower pH  
245 conditions, red-light absorption increased and green-light absorption decreased,  
246 except for Anc2 *15Z*, which showed stable green-light absorption under the tested  
247 pH conditions. The  $pK_a$  values of the *15Z* chromophore are lower than those of  
248 *15E*, indicating that the *15Z* chromophore has a lower affinity to protons ([Table 2](#)).  
249 The difference of  $pK_a$  values between *15Z* and *15E* was the smallest in Anc1 ([Table](#)  
250 [2](#)), which may be consistent with its poor spectral shift upon photoconversion under  
251 the standard pH condition of 7.5 ([Figure 2](#)). Our analyses therefore suggest that a  
252 photochromic photocycle similar to that of extant green/red CBCRs was also the  
253 ancestral photo-switching mechanism.

#### 254 **Conserved CBCR hallmark residues do not control the green/red photocycle**

255 Lastly, we sought to gain insights into the molecular mechanisms of color tuning of  
256 the ancestral CBCR proteins relative to canonical red/far-red phytochromes. We  
257 first focused on what allows deprotonation of the chromophore. In canonical  
258 phytochromes, the chromophore is protonated in both photostates (27, 31–33).  
259 The protonated state is stabilized by a conserved aspartate (Asp) residue that  
260 forms a hydrogen bond network with the nitrogen atoms of the B and C pyrrole  
261 rings of the chromophore (34–37). The resurrected CBCR ancestors feature either  
262 an alanine or glutamate residue at the position 54, suggesting that the substitution  
263 of Asp to a different amino acid allowed the deprotonation of the chromophore. To  
264 test this hypothesis, we mutated this site to Asp in all three ancestral proteins,

265 mimicking the situation in canonical phytochromes and CBCRs. We then  
266 determined whether the deprotonation of the chromophore was affected, and found  
267 that green-light absorption and deprotonation were both unaffected in all three  
268 mutants ([Table 1–2](#), [Figure S10–11](#)). This suggests that the loss of the protonation-  
269 stabilizing Asp was neither essential for the evolution of a deprotonated  
270 chromophore in the *15Z* photostate nor for green-light absorption.

271 Finally, we investigated the influence of another site – the so-called ‘second  
272 cysteine’ at position 56 that is known to influence spectral tuning in extant CBCRs.  
273 CBCRs containing this Cys form a thioether linkage with the C10 position of the  
274 bilin chromophore (38). The disruption of the  $\pi$ -conjugated system at the C10  
275 position leads to absorption in the UV-to-blue light region (10, 39). Therefore, the  
276 evolution of this second Cys could have contributed to the spectral properties that  
277 distinguish CBCRs from canonical phytochromes. However, the predicted  
278 ancestral sequences are in disagreement with the presence of the second Cys in  
279 the LCA of all CBCRs: only Anc1 harbors the second Cys residue ([Figure 1D](#),  
280 [Figure S4](#)), whereas Anc2 and Anc3 have a valine at this position. Although all  
281 three proteins have a green/red photocycle, this introduces ambiguity about  
282 whether the second Cys played an important role in the evolution of the green/red  
283 photocycle: It is possible that the function of this cysteine depends on the specific  
284 context of the protein such as the neighboring amino acid residues. To address  
285 this issue, we mutated the Cys at position 56 of Anc1 to valine (identical to the  
286 state in Anc2 and Anc3) and tested for differences in spectral properties. The  
287 mutation only slightly elevated the absorbance in the red region compared to the  
288 green one of both, *15E* and *15Z* photostates, but without affecting the absorption  
289 maxima ([Table 1–2](#), [Figure S10–11](#)). This confirms that a green/red photocycle

290 was present in the LCA of all CBCR GAF domains, regardless of the presence of  
291 the second cysteine in the ancestral protein.

## 292 Discussion

### 293 **The first CBCRs most probably functioned in chromatic acclimation**

294 Our results strongly suggest that the LCA of extant CBCRs functioned as a  
295 green/red light sensor with slow thermal reversion that used a photochromic  
296 photocycle similar to that of extant green/red sensing CBCRs. What physiological  
297 function did this receptor fulfil? One plausible answer upon comparison with  
298 extant CBCRs that have similar photocycles suggests their involvement in  
299 regulating the relative amounts of red-absorbing phycocyanin and green-  
300 absorbing phycoerythrin in phycobilisomes during chromatic acclimation (18).  
301 This hypothesis is further supported by the analysis of neighboring domains as  
302 the extant chromatic acclimation regulators also harbor an additional PAS domain  
303 and a histidine kinase as the output domain (17). This implies that the LCA of all  
304 extant cyanobacteria, in which the here identified ancestral GAF domain would  
305 have existed, already possessed phycoerythrin. Members of the Gloeobacterales  
306 (the earliest diverging clade of cyanobacteria) usually possess phycoerythrin,  
307 suggesting that the pigment has an ancient origin (21, 29, 40). This implies that  
308 phycoerythrin and the ability for chromatic acclimation already existed in the  
309 earliest cyanobacteria. It is of note that extant green/red CBCRs are also  
310 regulators of the different types of chromatic acclimation to control the relative  
311 amounts of the yellow–green-absorbing phycoerythrocyanin protein or a rod-  
312 membrane linker CpcL protein, which assembles the photosystem I-specific

313 phycobilisome (17, 41). Thus, green/red light sensing could be crucial even for  
314 cyanobacterial strains lacking green-absorbing phycoerythrin.

315 Chromatic acclimation was likely important to early cyanobacteria, as a  
316 current analysis points to them having lived in sessile microbial mats (42). In  
317 these environments, availability of different wavelengths of light can change  
318 dramatically and rapidly across minute distances, depending on the depth of the  
319 cell in the mat or the composition of the overlying cells (19).

### 320 **Tuning of the chromophore towards green/red sensing**

321 Based on our current work, we can speculate about the genetic mechanism that  
322 was responsible for the evolution of the CBCR's green/red light sensitivity from  
323 red/far-red sensing canonical phytochromes. Two changes must have occurred:  
324 the shift of the *15Z* state from red to green, and that of the *15E* state from far-red  
325 to red-light absorption.

326 Our results show that the *15Z* state was deprotonated in the ancestral  
327 proteins. This is different from phytochromes, in which the bilin chromophore is  
328 protonated in both photostates (27, 31–33), suggesting that deprotonation of the  
329 chromophore was an important requirement for evolving green-light absorption.  
330 The ancestral proteins all lack the conserved Asp, important for stabilization of  
331 the protonated state in phytochromes (36, 37), suggesting that this substitution  
332 may have allowed for deprotonation. However, introducing the Asp back into the  
333 ancestral photoreceptors does not abolish deprotonation, implying the  
334 involvement of other factors for deprotonation of the chromophore.

335 In addition, observations from extant CBCRs and phytochromes suggest  
336 that deprotonation alone is likely not sufficient to yield green light absorption: the

337 cyanobacterial canonical phytochrome Cph1 exhibits a pK<sub>a</sub> of ~9.0 in the *15Z* and  
338 *15E* photostates to stabilize the protonated chromophore. Increasing the solvent  
339 pH induces a decrease in red-light absorption by Cph1 but does not cause an  
340 increase in green-light absorption (43). The red/green CBCR AnPixJg2 retains  
341 the protonated chromophore even at the green-absorbing state, and artificial  
342 deprotonation does not affect the green absorption (44). This suggests that green  
343 absorption requires additional amino acid substitutions affecting the light  
344 wavelength absorbed by the deprotonated chromophore.

345 The *15E* state is also hypsochromically shifted from far-red to red  
346 absorption. This could have occurred through the loss of the adjacent PHY  
347 domain from an ancestral phytochrome-like precursor. Such truncations led to a  
348 blue shift of the far-red absorbing state of extant phytochromes (28, 34, 45).  
349 Another suggested tuning mechanism is the “second” Cys, that is found near the  
350 chromophore and is known to influence the absorption properties of proteins from  
351 various lineages of CBCR GAF domains (10, 39, 46, 47). However, the  
352 reconstructed ancestral proteins vary in the amino acid at that position; Anc1 has  
353 a cysteine, whereas Anc2 and Anc3 both have valine. Mutating this cysteine in  
354 Anc1 has no effect on optical properties, suggesting that in the LCA of all CBCR  
355 GAF domains this site was not essential for color tuning. Further exploration  
356 would throw light upon the exact genetic mechanism that transformed a likely  
357 red/far-red sensing phytochrome into a green/red sensing CBCR.



358        **The genetic basis of CBCRs diversified from an ancestral green/red light**  
359        **sensor**

360        Our results hint at how the remarkable diversity of colors found in extant CBCRs  
361        may have evolved from a green/red sensing ancestor. The ancestral proteins  
362        reconstructed in this work all possess the ability to also sense blue light, which  
363        was likely later exploited in CBCRs with blue-light photocycles. Additionally, the  
364        ancestral photoreceptors most likely already had the ability to bind BV which  
365        could have enabled the evolution of several extant CBCR groups that utilize BV  
366        in their photocycle and are hence able to perceive different wavelengths.

367                In addition, evolution of two-color sensing in the LCA of CBCR GAF  
368        domains, probably made it easier to further tinker with the exact wavelengths of  
369        the *15Z* and *15E* photostates through changes affecting the local environment  
370        and  $pK_a$  of the chromophore. Our characterization of sequences representative of  
371        the first CBCR sets the stage to elucidate exactly how this tinkering occurred in  
372        the colorful history of CBCR proteins.

## 373 **Methods**

### 374 **Phylogenetics and ancestral sequence reconstruction**

375 Amino acid sequences of cyanobacterial proteins containing GAF domains were  
376 gathered using protein-protein BLAST (nr database) and a CBCR protein as a  
377 query (48). Models (XM/XP) and uncultured/environmental sample sequences  
378 were excluded from the search. Protein sequences were selected to represent  
379 the whole cyanobacterial species phylogeny based on recently published data  
380 (49). Sequences that were annotated to multiple species as well as incomplete  
381 sequences were excluded. Conserved domains of each sequence were identified  
382 with the HMMER web server using the Pfam database (50). CBCR GAF domain  
383 sequences were aligned with MUSCLE (51), and the alignment was manually  
384 cropped to remove gaps by deleting lineage-specific and non-parsimonious  
385 inserts (52). The cropped alignment was used to infer an initial ML phylogeny  
386 using RAxML (53) in the PROTGAMMAAUTO mode resulting in the LG likelihood  
387 model with fixed base frequencies. The resulting tree was rooted using GAF  
388 domain sequences of proteins lacking the PAS domain but containing the C-  
389 terminal PHY domain as an outgroup (cyanobacterial PAS-less phytochromes)  
390 (54). The last common ancestor of all CBCR GAF domains (Anc1) was  
391 reconstructed at the internal node indicated in [Figure 1A](#) on Tree A using the  
392 CodeML package of PAML (55) with the LG substitution model and 16 gamma  
393 categories. Due to the suspicious long branch of the first branching sequences,  
394 an alternative tree (Tree B) was inferred by deletion of these sequences from the  
395 multiple sequence alignment. An alternative ancestor (Anc2) was equivalently

396 reconstructed on Tree B. For the third ancestral sequence (Anc3), Tree C was  
397 inferred after deleting all domains with particular long branches or poorly aligned  
398 sequences from the alignment. The robustness of each topology was tested by  
399 running 100 nonparametric bootstraps, and calculating the transfer bootstrap  
400 estimates (TBE) for internal nodes using the BOOSTER web tool (56).  
401 Additionally, approximate likelihood ratios were calculated with PhyML (57). The  
402 consensus neighbor and output domains of each group on the trees were  
403 determined manually and mapped next to the topologies ([Figure 1](#)).

#### 404 **Plasmid construction**

405 Codon-optimized sequences for *E. coli* encoding the ancestral CBCR GAF  
406 domains of Anc1, Anc2, and Anc3 ([Table S1](#)) were obtained from Twist  
407 Bioscience (San Francisco, California, USA) on the pTwist Amp vector. The  
408 synthesized gene fragments were amplified by PCR and subcloned into a  
409 pET28V vector containing an N-terminal, TEV-cleavable 6xHis tag via assembly  
410 cloning (AQUA cloning) (58). Utilized oligonucleotides are provided in [Table S2](#).  
411 Sequences of the constructs were confirmed by Sanger sequencing.

412 The PCB chromophore biosynthesis plasmid pTDho1pcyA was a kind gift  
413 from Prof. Nicole Frankenberg-Dinkel (University of Kaiserslautern) (59). The N-  
414 terminal 6xHis tag of PcyA was removed via AQUA cloning using the primers  
415 pTDho1pcyA-1F/-2R to obtain pTDho1pcyA-HisTag. For the construction of the  
416 BV-producing plasmid, the *pcyA* gene was deleted via AQUA cloning using the  
417 primers pTDho1pcyA-3bF/-4bR to obtain the pTDho1 plasmid.

## 418 **Protein expression and purification**

419 The *E.coli* strain BL21(DE3) was co-transformed with one of the pET28V plasmids  
420 harboring the gene for Anc1, Anc2 or Anc3, respectively, and either the PCB  
421 producing pTDho1pcyA-HisTag plasmid or the BV producing pTDho1 plasmid. The  
422 cultures were induced with 0.1 M isopropyl- $\beta$ -D-thiogalactopyranosid and grown  
423 overnight at 25°C in LB medium with appropriate antibiotics. The cells were  
424 harvested and disrupted three times using a french press at 20000 psi in 50 mM  
425 HEPES-NaOH, pH 7.5; 300 mM NaCl, 10% (w/v) glycerol, 0.5 mM tris(2-  
426 carboxyethyl)phosphine (TCEP), and 30 mM imidazole. The His-tagged proteins  
427 were purified by affinity chromatography with nickel affinity columns (HisTrap 1 ml;  
428 Cytiva) using the Äkta pure system (GE Healthcare UK Ltd.). Elution was carried  
429 out at a flow rate of 1 ml/min with all solutions maintained at 4 °C and a linear  
430 imidazole concentration gradient from 30 mM to 530 mM.

## 431 **SDS-PAGE and fluorescence detection of PCB**

432 To check the purity of the protein samples, they were first denatured using 62.5  
433 mM Tris-HCl, pH 6.8; 11.25% (w/v) glycerol, 4% SDS, 10 mM DTT, and 0.0125%  
434 (w/v) bromophenol blue and incubated at 95°C for 5 min. They were separated by  
435 SDS polyacrylamide gel electrophoresis using a 16% Tris-Tricine acrylamide gel  
436 (60). The gel was then incubated in 2 mM zinc acetate solution for 15 min and  
437 fluorescence signals were imaged using a Fusion SL (Peqlab) with a F595 Y3 filter.  
438 The gel was further stained with Coomassie G-250.

## 439 **Light sources**

440 To irradiate purified proteins, LEDs illuminating at 355 nm for UV light, 448 nm for  
441 blue light, 514 nm for green light, 635 nm for red light, and 731 nm for far-red light  
442 were used ([Figure S12](#)).

## 443 **Spectroscopy and pH titration analysis**

444 To measure the absorption spectra, the purified proteins were dialyzed in 50 mM  
445 HEPES-NaOH, pH 7.5; 300 mM NaCl, 10% (w/v) glycerol, 0.5 mM TCEP  
446 followed by irradiation with a specific wavelength for around one minute each at  
447 room temperature. The absorption spectra were acquired using a UV-2450  
448 spectrophotometer (Shimadzu) in the dark. Thermal reversion was achieved by  
449 incubating the samples in dark overnight at room temperature. To acquire the  
450 absorption spectra of the acid denatured proteins, 140  $\mu$ l of the sample was  
451 mixed with 560  $\mu$ l of 10 M urea (pH 2.0) by pipetting followed by immediate  
452 measurement of absorbance spectra.

453 For pH titration, the purified protein was dialyzed in 10 mM HEPES-NaOH, pH  
454 7.5; 300 mM NaCl, 0.5 mM TCEP using desalting columns (HiTrap 5ml; Cytiva)  
455 and was diluted with the same buffer in a 1:1 ratio. 560 $\mu$ l of the diluted protein  
456 was converted to either *15E* or *15Z* photostate by irradiation of either blue, green  
457 or red light for one minute or incubation in the dark overnight, followed by the  
458 addition of 140  $\mu$ l of the following buffers in the dark (each 1M): MES-NaOH for  
459 pH 5.0-6.5; HEPES-NaOH for pH 7.0-8.5; or glycine-NaOH for pH 9.0-11.0. The  
460 pH titration data were analyzed by fitting the absorbance value at a particular  
461 wavelength using nonlinear regression in Prism software. The pK<sub>a</sub> values of the

462 chromophore were determined using Henderson-Hasselbalch equations of a  
463 single titrating group (11, 36).

## 464 **Acknowledgments**

465 We thank Prof. Nicole Frankenberg-Dinkel for the kind gift of the chromophore  
466 biosynthesis plasmid, and Prof. J. Clark Lagarias and Dr. Nathan C. Rockwell for  
467 providing the alignment of GAF domains and fruitful discussions. G.E. is  
468 supported by the EMBO postdoctoral fellowship (ALTF 274-2017) and JSPS  
469 Overseas Research Fellowships. N.P. was supported in part by the Excellence  
470 Initiative of the German Research Foundation (GSC-4, Spemann Graduate  
471 School) and in part by the Ministry for Science, Research and Arts of the State of  
472 Baden-Wuerttemberg. N.S., D.W., and G.K.A.H. are supported by the Max  
473 Planck Society.

## 474 References

- 475 1. A. Möglich, X. Yang, R. A. Ayers, K. Moffat, Structure and function of plant  
476 photoreceptors. *Annu. Rev. Plant Biol.* **61**, 21–47 (2010).
- 477 2. N. C. Rockwell, J. C. Lagarias, A brief history of phytochromes. *Chemphyschem*  
478 **11**, 1172–80 (2010).
- 479 3. K. Anders, L. O. Essen, The family of phytochrome-like photoreceptors: diverse,  
480 complex and multi-colored, but very useful. *Curr. Opin. Struct. Biol.* **35**, 7–16  
481 (2015).
- 482 4. C. Song, *et al.*, The D-ring, not the A-ring, rotates in *Synechococcus* OS-B '  
483 phytochrome. *J. Biol. Chem.* **289**, 2552–62 (2014).
- 484 5. C. Klose, F. Nagy, E. Schäfer, Thermal Reversion of Plant Phytochromes. *Mol.*  
485 *Plant* **13**, 386–397 (2020).
- 486 6. N. C. Rockwell, S. S. Martin, J. C. Lagarias, Red/green cyanobacteriochromes:  
487 sensors of color and power. *Biochemistry* **51**, 9667–9677 (2012).
- 488 7. M. Ikeuchi, T. Ishizuka, Cyanobacteriochromes: a new superfamily of  
489 tetrapyrrole-binding photoreceptors in cyanobacteria. *Photochem Photobiol Sci*  
490 **7**, 1159–67 (2008).
- 491 8. N. C. Rockwell, J. C. Lagarias, Phytochrome evolution in 3D: deletion,  
492 duplication, and diversification. *New Phytol.* **225**, 2283–2300 (2020).
- 493 9. K. Fushimi, R. Narikawa, Cyanobacteriochromes: photoreceptors covering the  
494 entire UV-to-visible spectrum. *Curr. Opin. Struct. Biol.* **57**, 39–46 (2019).
- 495 10. N. C. Rockwell, S. S. Martin, K. Feoktistova, J. C. Lagarias, Diverse two-  
496 cysteine photocycles in phytochromes and cyanobacteriochromes. *Proc Natl*  
497 *Acad Sci U S A* **108**, 11854–9 (2011).
- 498 11. Y. Hirose, *et al.*, Green/red cyanobacteriochromes regulate complementary  
499 chromatic acclimation via a protochromic photocycle. *Proc Natl Acad Sci U S A*  
500 **110**, 4974–9 (2013).
- 501 12. N. C. Rockwell, S. S. Martin, A. G. Gulevich, J. C. Lagarias, Conserved  
502 phenylalanine residues are required for blue-shifting of cyanobacteriochrome  
503 photoproducts. *Biochemistry* **53**, 3118–30 (2014).
- 504 13. O. S. Oliinyk, K. G. Chernov, V. V. Verkhusha, Bacterial phytochromes,  
505 cyanobacteriochromes and allophycocyanins as a source of near-infrared  
506 fluorescent probes. *Int J Mol Sci* **18** (2017).
- 507 14. M. Blain-Hartung, N. C. Rockwell, J. C. Lagarias, Light-Regulated Synthesis of  
508 Cyclic-di-GMP by a Bidomain Construct of the Cyanobacteriochrome Tlr0924  
509 (SesA) without Stable Dimerization. *Biochemistry* **56**, 6145–6154 (2017).
- 510 15. K. Fushimi, G. Enomoto, M. Ikeuchi, R. Narikawa, Distinctive properties of dark  
511 reversion kinetics between two red/green-type cyanobacteriochromes and their  
512 application in the photoregulation of cAMP synthesis. *Photochem. Photobiol.* **93**,  
513 681–691 (2017).
- 514 16. L. B. Wiltbank, D. M. Kehoe, Diverse light responses of cyanobacteria mediated  
515 by phytochrome superfamily photoreceptors. *Nat. Rev. Microbiol.* **17**, 37–50  
516 (2019).
- 517 17. Y. Hirose, *et al.*, Diverse Chromatic Acclimation Processes Regulating  
518 Phycoerythrocyanin and Rod-Shaped Phycobilisome in Cyanobacteria. *Mol.*  
519 *Plant* **12**, 715–725 (2019).
- 520 18. J. E. Sanfilippo, L. Garczarek, F. Partensky, D. M. Kehoe, Chromatic



- 521 Acclimation in Cyanobacteria: A Diverse and Widespread Process for  
522 Optimizing Photosynthesis. *Annu. Rev. Microbiol.* **73**, 407–433 (2019).
- 523 19. G. Enomoto, M. Ikeuchi, Blue-/Green-Light-Responsive Cyanobacteriochromes  
524 Are Cell Shade Sensors in Red-Light Replete Niches. *iScience* **23**, 100936  
525 (2020).
- 526 20. F. D. Conradi, C. W. Mullineaux, A. Wilde, The Role of the Cyanobacterial Type  
527 IV Pilus Machinery in Finding and Maintaining a Favourable Environment. *Life*  
528 **10**, 252 (2020).
- 529 21. N. Rahmatpour, *et al.*, A novel thylakoid-less isolate fills a billion-year gap in the  
530 evolution of Cyanobacteria. *Curr. Biol.* **31**, 2857-2867.e4 (2021).
- 531 22. G. K. A. Hochberg, J. W. Thornton, Reconstructing Ancient Proteins to  
532 Understand the Causes of Structure and Function. *Annu. Rev. Biophys.* **46**,  
533 247–269 (2017).
- 534 23. T. R. Berkelman, J. C. Lagarias, Visualization of bilin-linked peptides and  
535 proteins in polyacrylamide gels. *Anal. Biochem.* **156**, 194–201 (1986).
- 536 24. T. Ishizuka, R. Narikawa, T. Kohchi, M. Katayama, M. Ikeuchi,  
537 Cyanobacteriochrome TePixJ of *Thermosynechococcus elongatus* harbors  
538 phycoviolobin as a chromophore. *Plant Cell Physiol.* **48**, 1385–90 (2007).
- 539 25. M. V. Moreno, N. C. Rockwell, M. Mora, A. J. Fisher, J. C. Lagarias, A far-red  
540 cyanobacteriochrome lineage specific for verdins. *Proc Natl Acad Sci U S A*  
541 **117**, 27962–27970 (2020).
- 542 26. R. Narikawa, *et al.*, A biliverdin-binding cyanobacteriochrome from the  
543 chlorophyll d-bearing cyanobacterium *Acaryochloris marina*. *Sci Rep* **5**, 7950  
544 (2015).
- 545 27. K. Anders, *et al.*, Spectroscopic and photochemical characterization of the red-  
546 light sensitive photosensory module of Cph2 from *Synechocystis* PCC 6803.  
547 *Photochem. Photobiol.* **87**, 160–73 (2011).
- 548 28. S. H. Wu, J. C. Lagarias, Defining the bilin lyase domain: lessons from the  
549 extended phytochrome superfamily. *Biochemistry* **39**, 13487–95 (2000).
- 550 29. M. Watanabe, M. Ikeuchi, Phycobilisome: architecture of a light-harvesting  
551 supercomplex. *Photosynth. Res.* **116**, 265–76 (2013).
- 552 30. M. Hasegawa, *et al.*, Molecular characterization of DXCF  
553 cyanobacteriochromes from the cyanobacterium *Acaryochloris marina* identifies  
554 a blue-light power sensor. *J. Biol. Chem.* **293**, 1713–1727 (2018).
- 555 31. S. Osoegawa, *et al.*, Identification of the Deprotonated Pyrrole Nitrogen of the  
556 Bilin-Based Photoreceptor by Raman Spectroscopy with an Advanced  
557 Computational Analysis. *J. Phys. Chem. B* **123**, 3242–3247 (2019).
- 558 32. E. S. Burgie, R. D. Vierstra, Phytochromes: An Atomic Perspective on  
559 Photoactivation and Signaling. *Plant Cell* **26**, 4568–4583 (2014).
- 560 33. Q.-Z. Xu, *et al.*, MAS NMR on a Red/Far-Red Photochromic  
561 Cyanobacteriochrome All2699 from *Nostoc*. *Int. J. Mol. Sci.* **20**, 3656 (2019).
- 562 34. J. R. Wagner, J. S. Brunzelle, K. T. Forest, R. D. Vierstra, A light-sensing knot  
563 revealed by the structure of the chromophore-binding domain of phytochrome.  
564 *Nature* **438**, 325–31 (2005).
- 565 35. R. Narikawa, *et al.*, Structures of cyanobacteriochromes from phototaxis  
566 regulators AnPixJ and TePixJ reveal general and specific photoconversion  
567 mechanism. *Proc Natl Acad Sci U S A* **110**, 918–23 (2013).
- 568 36. T. Sato, *et al.*, Protochromic absorption changes in the two-cysteine photocycle  
569 of a blue/orange cyanobacteriochrome. *J. Biol. Chem.* **294**, 18909–18922  
570 (2019).

- 571 37. D. von Stetten, *et al.*, Highly conserved residues Asp-197 and His-250 in Agp1  
572 phytochrome control the proton affinity of the chromophore and Pfr formation. *J.*  
573 *Biol. Chem.* **282**, 2116–23 (2007).
- 574 38. E. S. Burgie, J. M. Walker, G. N. Phillips, R. D. Vierstra, A photo-labile thioether  
575 linkage to phycoviolobin provides the foundation for the blue/green photocycles  
576 in DXCF-cyanobacteriochromes. *Structure* **21**, 88–97 (2013).
- 577 39. N. C. Rockwell, S. S. Martin, J. C. Lagarias, There and Back Again: Loss and  
578 Reacquisition of Two-Cys Photocycles in Cyanobacteriochromes. *Photochem.*  
579 *Photobiol.* **93**, 741–754 (2017).
- 580 40. C. L. Grettenberger, *et al.*, A phylogenetically novel cyanobacterium most  
581 closely related to *Gloeobacter*. *ISME J.* **14**, 2142–2152 (2020).
- 582 41. M. Watanabe, *et al.*, Attachment of phycobilisomes in an antenna-photosystem I  
583 supercomplex of cyanobacteria. *Proc Natl Acad Sci U S A* **111**, 2512–7 (2014).
- 584 42. K. Hammerschmidt, G. Landan, F. Domingues Kümmel Tria, J. Alcorta, T.  
585 Dagan, The Order of Trait Emergence in the Evolution of Cyanobacterial  
586 Multicellularity. *Genome Biol. Evol.* **13**, evaa249 (2021).
- 587 43. F. Velazquez Escobar, *et al.*, Protonation-Dependent Structural Heterogeneity  
588 in the Chromophore Binding Site of Cyanobacterial Phytochrome Cph1. *J. Phys.*  
589 *Chem. B* **121**, 47–57 (2017).
- 590 44. C. Song, *et al.*, A Red/Green Cyanobacteriochrome Sustains Its Color Despite a  
591 Change in the Bilin Chromophore’s Protonation State. *Biochemistry* **54**, 5839–  
592 5848 (2015).
- 593 45. T. Fischer, *et al.*, Effect of the PHY Domain on the Photoisomerization Step of  
594 the Forward P<sub>r</sub> → P<sub>fr</sub> Conversion of a Knotless Phytochrome. *Chem. – Eur. J.*  
595 **26**, 17261–17266 (2020).
- 596 46. R. Narikawa, G. Enomoto, W. Ni Ni, K. Fushimi, M. Ikeuchi, A new type of dual-  
597 Cys cyanobacteriochrome GAF domain found in cyanobacterium *Acaryochloris*  
598 *marina*, which has an unusual red/blue reversible photoconversion cycle.  
599 *Biochemistry* **53**, 5051–9 (2014).
- 600 47. M. Blain-Hartung, N. C. Rockwell, J. C. Lagarias, Natural diversity provides a  
601 broadspectrum of cyanobacteriochrome-based diguanylate cyclases. *Plant*  
602 *Physiol.*, kiab240 (2021).
- 603 48. S. Altschul, Gapped BLAST and PSI-BLAST: a new generation of protein  
604 database search programs. *Nucleic Acids Res.* **25**, 3389–3402 (1997).
- 605 49. K. R. Moore, *et al.*, An Expanded Ribosomal Phylogeny of Cyanobacteria  
606 Supports a Deep Placement of Plastids. *Front. Microbiol.* **10**, 1612 (2019).
- 607 50. S. C. Potter, *et al.*, HMMER web server: 2018 update. *Nucleic Acids Res.* **46**,  
608 W200–W204 (2018).
- 609 51. F. Madeira, *et al.*, The EMBL-EBI search and sequence analysis tools APIs in  
610 2019. *Nucleic Acids Res.* **47**, W636–W641 (2019).
- 611 52. R. C. Edgar, MUSCLE: multiple sequence alignment with high accuracy and  
612 high throughput. *Nucleic Acids Res.* **32**, 1792–7 (2004).
- 613 53. A. Stamatakis, RAXML version 8: a tool for phylogenetic analysis and post-  
614 analysis of large phylogenies. *Bioinformatics* **30**, 1312–1313 (2014).
- 615 54. A. T. Ulijasz, *et al.*, Characterization of Two Thermostable Cyanobacterial  
616 Phytochromes Reveals Global Movements in the Chromophore-binding Domain  
617 during Photoconversion. *J. Biol. Chem.* **283**, 21251–21266 (2008).
- 618 55. Z. Yang, PAML 4: Phylogenetic Analysis by Maximum Likelihood. *Mol. Biol.*  
619 *Evol.* **24**, 1586–1591 (2007).
- 620 56. F. Lemoine, *et al.*, Renewing Felsenstein’s phylogenetic bootstrap in the era of

- 621 big data. *Nature* **556**, 452–456 (2018).
- 622 57. S. Guindon, *et al.*, New Algorithms and Methods to Estimate Maximum-  
623 Likelihood Phylogenies: Assessing the Performance of PhyML 3.0. *Syst. Biol.*  
624 **59**, 307–321 (2010).
- 625 58. H. M. Beyer, *et al.*, AQUA cloning: a versatile and simple enzyme-free cloning  
626 approach. *PLoS One* **10**, e0137652 (2015).
- 627 59. T. Dammeyer, S. C. Bagby, M. B. Sullivan, S. W. Chisholm, N. Frankenberg-  
628 Dinkel, Efficient phage-mediated pigment biosynthesis in oceanic  
629 cyanobacteria. *Curr. Biol.* **18**, 442–8 (2008).
- 630 60. H. Schägger, Tricine–SDS-PAGE. *Nat. Protoc.* **1**, 16–22 (2006).



638 support is shown as approximate likelihood test statistics (*italic numbers*) and transfer  
639 bootstrap expectations (TBE, 100 replicates, circles). Scale bar: 0.1 average  
640 substitutions per site. Consensus neighbor and output domains of corresponding full-  
641 length proteins are shown to the right of the trees with domains that only appear in  
642 most of the proteins with dashed outlines. *var*: variable domains. *other*: conserved  
643 domains other than PAS, PHY (Phytochrome-specific domain) or HK (histidine  
644 kinase/HATPase). (D) Amino acid sequences of the reconstructed ancestral GAF  
645 domains. Arrows point positions important for color sensing in extant CBCRs.

646

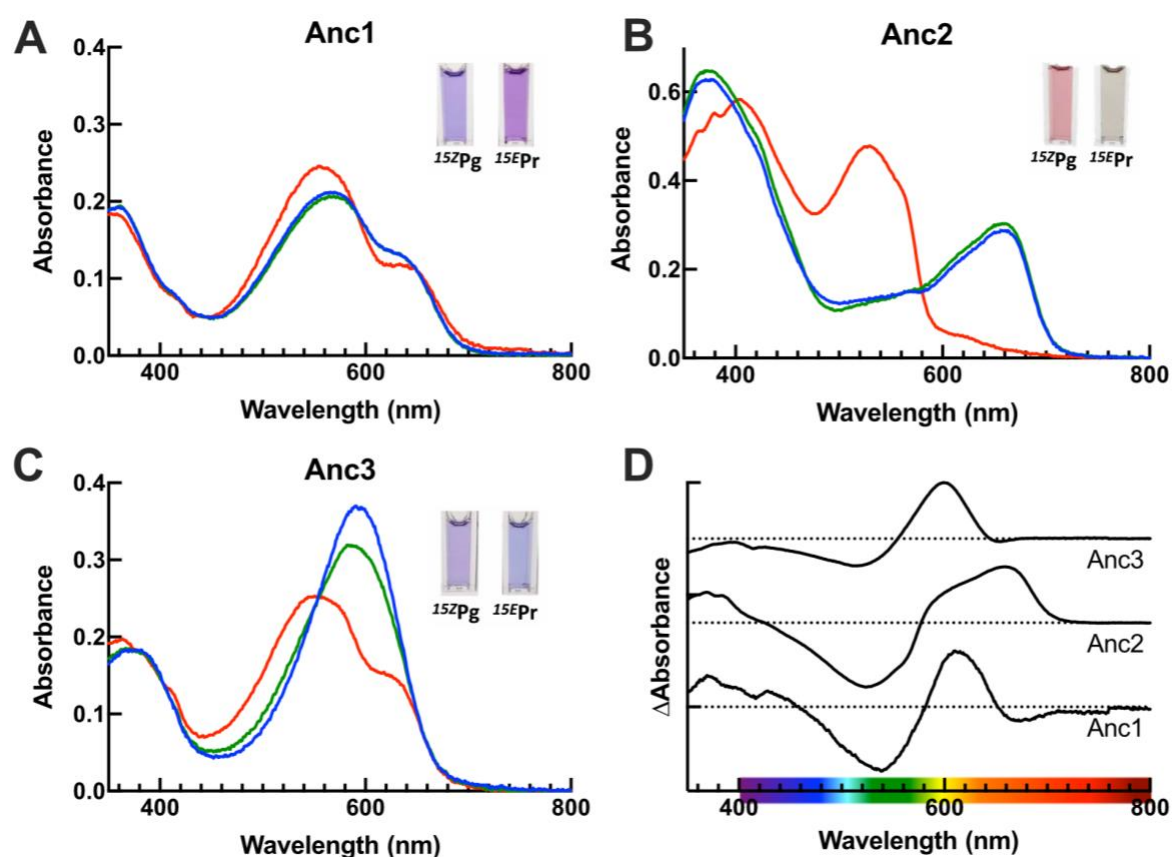

647

648 **Figure 2. Absorption and difference spectra of the purified ancestral proteins.**

649 (A-C) Absorption spectra of the  $^{15ZPg}$  (red line), and of the  $^{15EPr}$  form (blue and green  
650 lines) of Anc1-3. The  $^{15ZPg}$  form was achieved by irradiation with red, the  $^{15EPr}$  form  
651 by either irradiation with blue or green for one minute. (D) Normalized photochemical  
652 difference spectra obtained by subtracting the absorption spectra of the  $^{15ZPg}$  from  
653 those of the  $^{15EPr}$  form of Anc1-3. Difference spectra were normalized on the red  
654 photoproduct peak, and are vertically shifted for clarity. (A-C insets) The difference in  
655 the color of the  $^{15ZPg}$  and the  $^{15EPr}$  forms of Anc1-3 in solution at pH 7.5. All  
656 experiments were performed at room temperature.



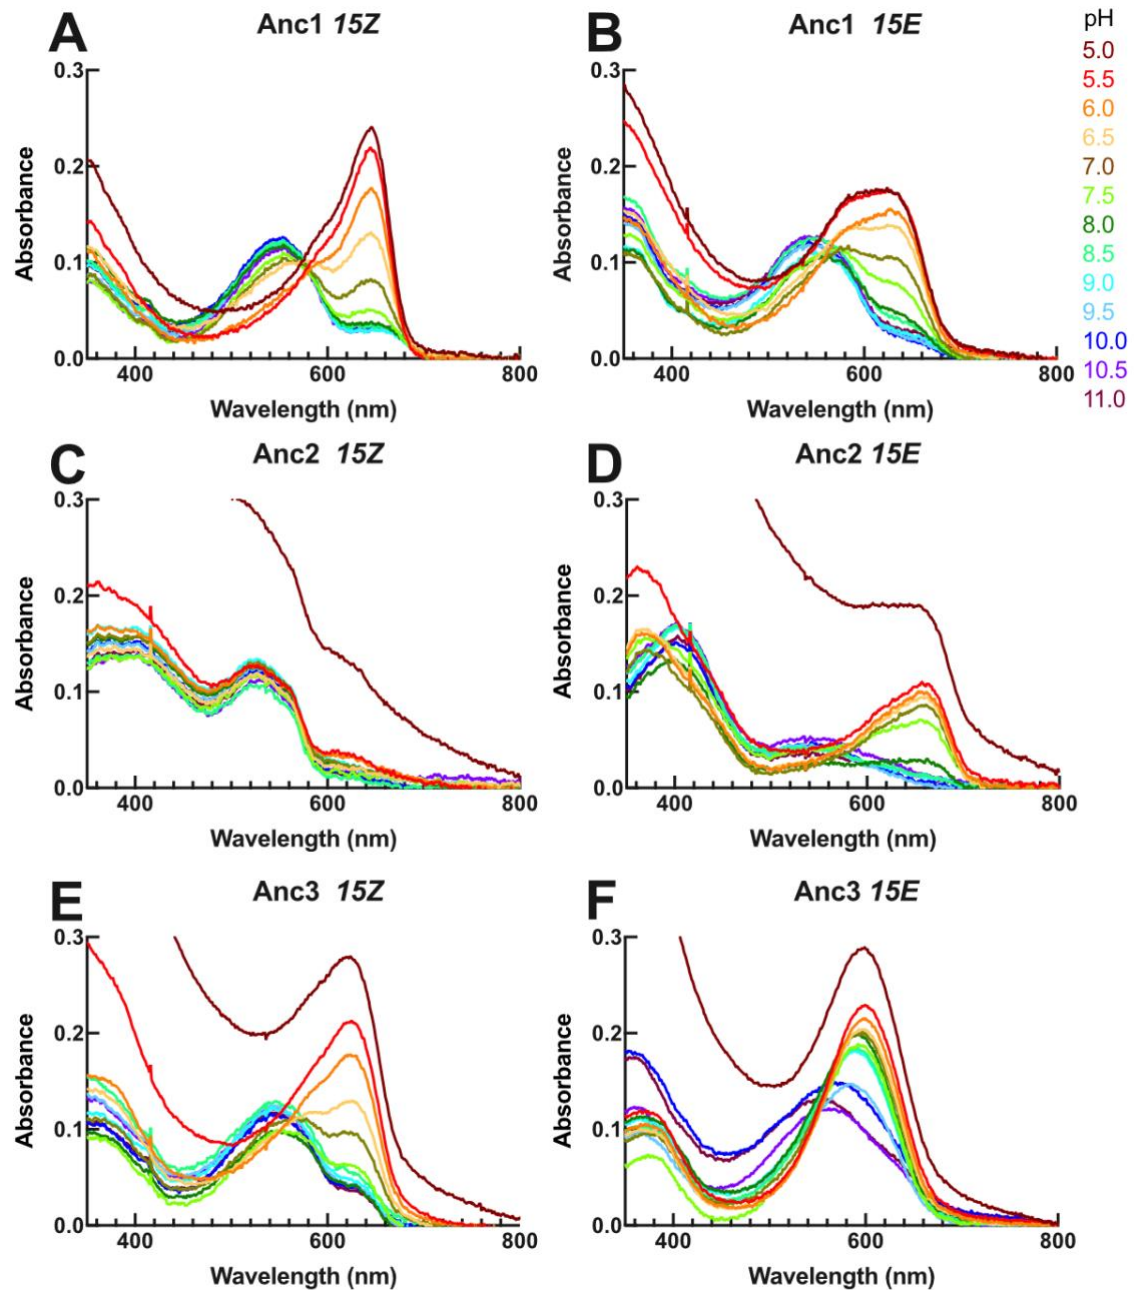

657

658 **Figure 3. Protochromic absorption spectra changes of the ancestral**  
659 **proteins.**

660 (A-F) pH-dependent absorbance spectra of Anc1-3 with the configuration of 15Z  
661 (A, C, E) or 15E (B, D, F) measured in buffers with pH between 5.0 (dark red)  
662 and 11.0 (dark purple) in 0.5 pH steps. Increased scattering was observed at  
663 lower pH of 5.0 and 5.5, probably due to partial protein aggregation. For the

664 analysis, samples were irradiated or dark-incubated to obtain homogenous *15Z*  
665 and *15E* photostates, followed by mixing with 1 M buffers of different pH in 1:4  
666 ratio and immediate measurement of absorption spectra.



667 **Table 1. Wavelengths of the absorbance peak maxima and the half-lives of**  
668 **thermal reversion of ancestral CBCR proteins at room temperature.**

| <b>Protein</b> | <b><math>\lambda_{\max, 15Z}</math></b> | <b><math>\lambda_{\max, 15E}</math></b> | <b>Half-life</b> |
|----------------|-----------------------------------------|-----------------------------------------|------------------|
| Anc1 WT        | 540 nm                                  | 610 nm                                  | 233 min          |
| Anc2 WT        | 525 nm                                  | 656 nm                                  | 180 min          |
| Anc3 WT        | 515 nm                                  | 600 nm                                  | 310 min          |
| Anc1 C56V      | 541 nm                                  | 621 nm                                  | n.d.             |
| Anc1 A54D      | 535 nm                                  | 620 nm                                  | n.d.             |
| Anc2 E54D      | 525 nm                                  | 660 nm                                  | n.d.             |
| Anc3 E54D      | 515 nm                                  | 602 nm                                  | n.d.             |

669 The peak wavelengths were calculated using the difference spectra upon reversible  
670 photoconversion. n.d., not determined  
671

672 **Table 2. The estimated pK<sub>a</sub> values of the ancestral CBCR proteins.**

| <b>Protein / configuration</b> | <b>pK<sub>a</sub></b> | <b>Absorption peaks for fitting</b> | <b>R<sup>2</sup></b> |
|--------------------------------|-----------------------|-------------------------------------|----------------------|
| Anc1 WT/ 15Z                   | 6.54                  | 650 nm                              | 0.9994               |
| Anc1 WT/ 15E                   | 7.22                  | 635 nm                              | 0.9936               |
| Anc2 WT/ 15Z                   | <5.0                  | n.a.                                | n.a.                 |
| Anc2 WT/ 15E                   | 7.57                  | 670 nm                              | 0.9613               |
| Anc3 WT/ 15Z                   | 6.59                  | 630 nm                              | 0.9859               |
| Anc3 WT/ 15E                   | 9.35                  | 610 nm                              | 0.9501               |
| Anc1 C56V/ 15Z                 | 6.77                  | 650 nm                              | 0.9959               |
| Anc1 C56V/ 15E                 | 7.46                  | 635 nm                              | 0.9887               |
| Anc1 A54D/ 15Z                 | 6.57                  | 650 nm                              | 0.9941               |
| Anc1 A54D/ 15E                 | 7.61                  | 635 nm                              | 0.9913               |
| Anc2 E54D/ 15Z                 | <5.0                  | n.a.                                | n.a.                 |
| Anc2 E54D/ 15E                 | 7.75                  | 670 nm                              | 0.9955               |
| Anc3 E54D/ 15Z                 | 6.58                  | 630 nm                              | 0.9653               |
| Anc3 E54D/ 15E                 | 9.48                  | 610 nm                              | 0.9697               |

673 The pK<sub>a</sub> values were calculated using the data of the absorption changes in the pH titration  
674 experiments in Figure 3. n.a., not applicable
